# Supplementary material
Source: Springer Nature journal article supplement (https://www.springermedizin.de/resource/supplementary/13033_2009_51_MOESM4_ESM.pdf/9651718)

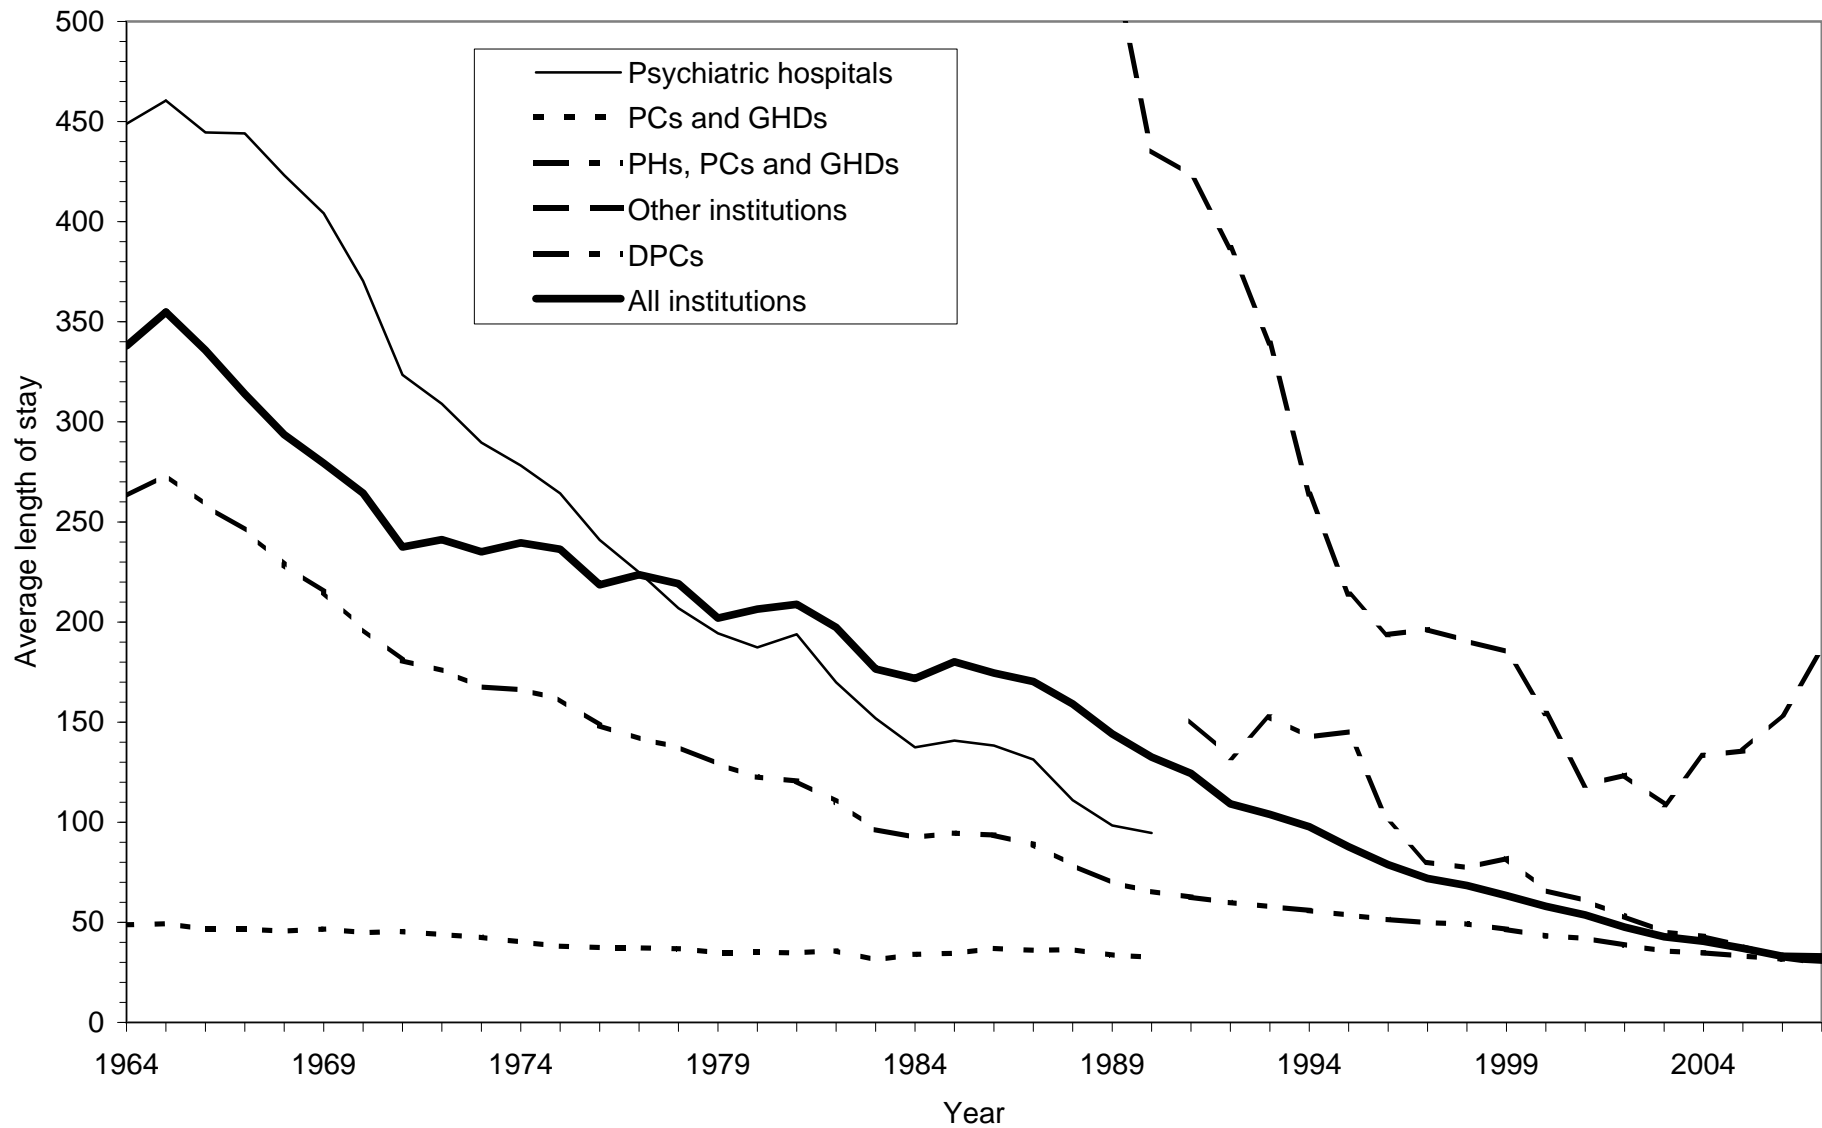

Supplement: MOESM4 [file 9651718]
